# Supplementary material for: High temperatures-related elderly mortality varied greatly from year to year: important information for heat-warning systems
Source: PubMed Central journal article supplement — Sci Rep. 2012 Nov 9;2:830. doi: 10.1038/srep00830 (PMC3494010; doi:10.1038/srep00830), 2012-11-09
Supplement: srep00830-s1.pdf [file srep00830-s1.pdf]

# Supplementary Information

## **High temperatures-related elderly mortality varied greatly from year to year: important information for heat-warning systems**

Yuming Guo<sup>1,2\*</sup>, Adrian G Barnett<sup>1</sup>, Shilu Tong<sup>1</sup>

<sup>1</sup> School of Public Health and Social Work, Institute of Health and Biomedical Innovation, Queensland University of Technology, Brisbane, QLD 4059, Australia;

<sup>2</sup> School of Medicine, The University of Queensland, Brisbane, QLD 4006, Australia.

**\*Corresponding author:**

Yuming Guo

School of Medicine, The University of Queensland, Brisbane, QLD 4006, Australia;

Telephone: +61 7 3346 4991;

Email address: guoyuming@yahoo.cn;

**Supplementary Table S1: List of the 83 US cities by region.**

| Region             | City                 | Abbreviation | State   | Region              | City              | Abbreviation | State |
|--------------------|----------------------|--------------|---------|---------------------|-------------------|--------------|-------|
| Industrial Midwest | Akron                | akr          | OH      | South East          | Atlanta           | atla         | GA    |
|                    | Buffalo              | buff         | NY      |                     | Baton Rouge       | batr         | LA    |
|                    | Chicago              | chic         | IL      |                     | Birmingham        | birn         | AL    |
|                    | Cincinnati           | cinc         | OH      |                     | Cayce             | cayc         | SC    |
|                    | Cleveland            | clev         | OH      |                     | Charlotte         | char         | NC    |
|                    | Columbus             | clmo         | OH      |                     | Dallas/Fort Worth | dlft         | TX    |
|                    | Dayton               | dayt         | OH      |                     | Greensboro        | grnb         | NC    |
|                    | Detroit              | det          | MI      |                     | Houston           | hous         | TX    |
|                    | Fort Wayne           | ftwa         | IN      |                     | Huntsville        | hunt         | AL    |
|                    | Grand Rapids         | gdrp         | MI      |                     | Jackson           | jcks         | MS    |
|                    | Indianapolis         | indi         | IN      |                     | Jacksonville      | jckv         | FL    |
|                    | Lexington            | lex          | KY      |                     | Knoxville         | knox         | TN    |
|                    | Louisville           | loui         | KY      |                     | Memphis           | memp         | TN    |
|                    | Madison              | madi         | WI      |                     | Miami             | miam         | FL    |
|                    | Milwaukee            | milw         | WI      |                     | Mobile            | mobi         | AL    |
|                    | Pittsburgh           | pitt         | PA      |                     | Nashville         | nash         | TN    |
|                    | St. Louis            | stlo         | MO      |                     | New Orleans       | no           | LA    |
| Toledo             | tole                 | OH           | Orlando | orla                | FL                |              |       |
| North East         | Baltimore            | balt         | MD      | Raleigh             | ral               | NC           |       |
|                    | Boston               | bost         | MA      | Shreveport          | shr               | LA           |       |
|                    | Jersey City          | jers         | NJ      | St. Petersburg      | stpe              | FL           |       |
|                    | Norfolk              | nor          | VA      | Tampa               | tamp              | FL           |       |
|                    | Newark               | nwk          | NJ      | Tulsa               | tuls              | OK           |       |
|                    | New York             | ny           | NY      | South West          | Albuquerque       | albu         | NM    |
|                    | Philadelphia         | phil         | PA      |                     | Austin            | aust         | TX    |
|                    | Providence           | prov         | RI      |                     | Corpus Christi    | corp         | TX    |
|                    | Rochester            | roch         | NY      |                     | El Paso           | elpa         | TX    |
|                    | Syracuse             | syra         | NY      |                     | Las Vegas         | lasv         | NV    |
| Washington         | dc                   | DC           | Lubbock |                     | lubb              | TX           |       |
| North West         | Denver               | denv         | CO      |                     | Oklahoma City     | okla         | OK    |
|                    | Oakland              | oakl         | CA      |                     | Phoenix           | phoe         | AZ    |
|                    | Portland             | port         | OR      |                     | San Antonio       | sana         | TX    |
|                    | Sacramento           | sacr         | CA      |                     | Tucson            | tucs         | AZ    |
|                    | Salt Lake City       | salt         | UT      | Southern California | Fresno            | fres         |       |
|                    | San Francisco        | sanf         | CA      |                     | Los Angeles       | la           | CA    |
|                    | San Jose             | sanj         | CA      |                     | Riverside         | rive         | CA    |
|                    | Seattle              | seat         | WA      |                     | San Bernardino    | sanb         | CA    |
|                    | Spokane              | spok         | WA      |                     | San Diego         | sand         | CA    |
|                    | Tacoma               | taco         | WA      |                     | Santa Ana/Anaheim | staa         | CA    |
| Upper Midwest      | Des Moines           | desm         | IA      |                     |                   |              |       |
|                    | Kansas City          | kan          | MO      |                     |                   |              |       |
|                    | Lincoln              | linc         | NE      |                     |                   |              |       |
|                    | Minneapolis/St. Paul | minn         | MN      |                     |                   |              |       |
|                    | Wichita              | wich         | KS      |                     |                   |              |       |

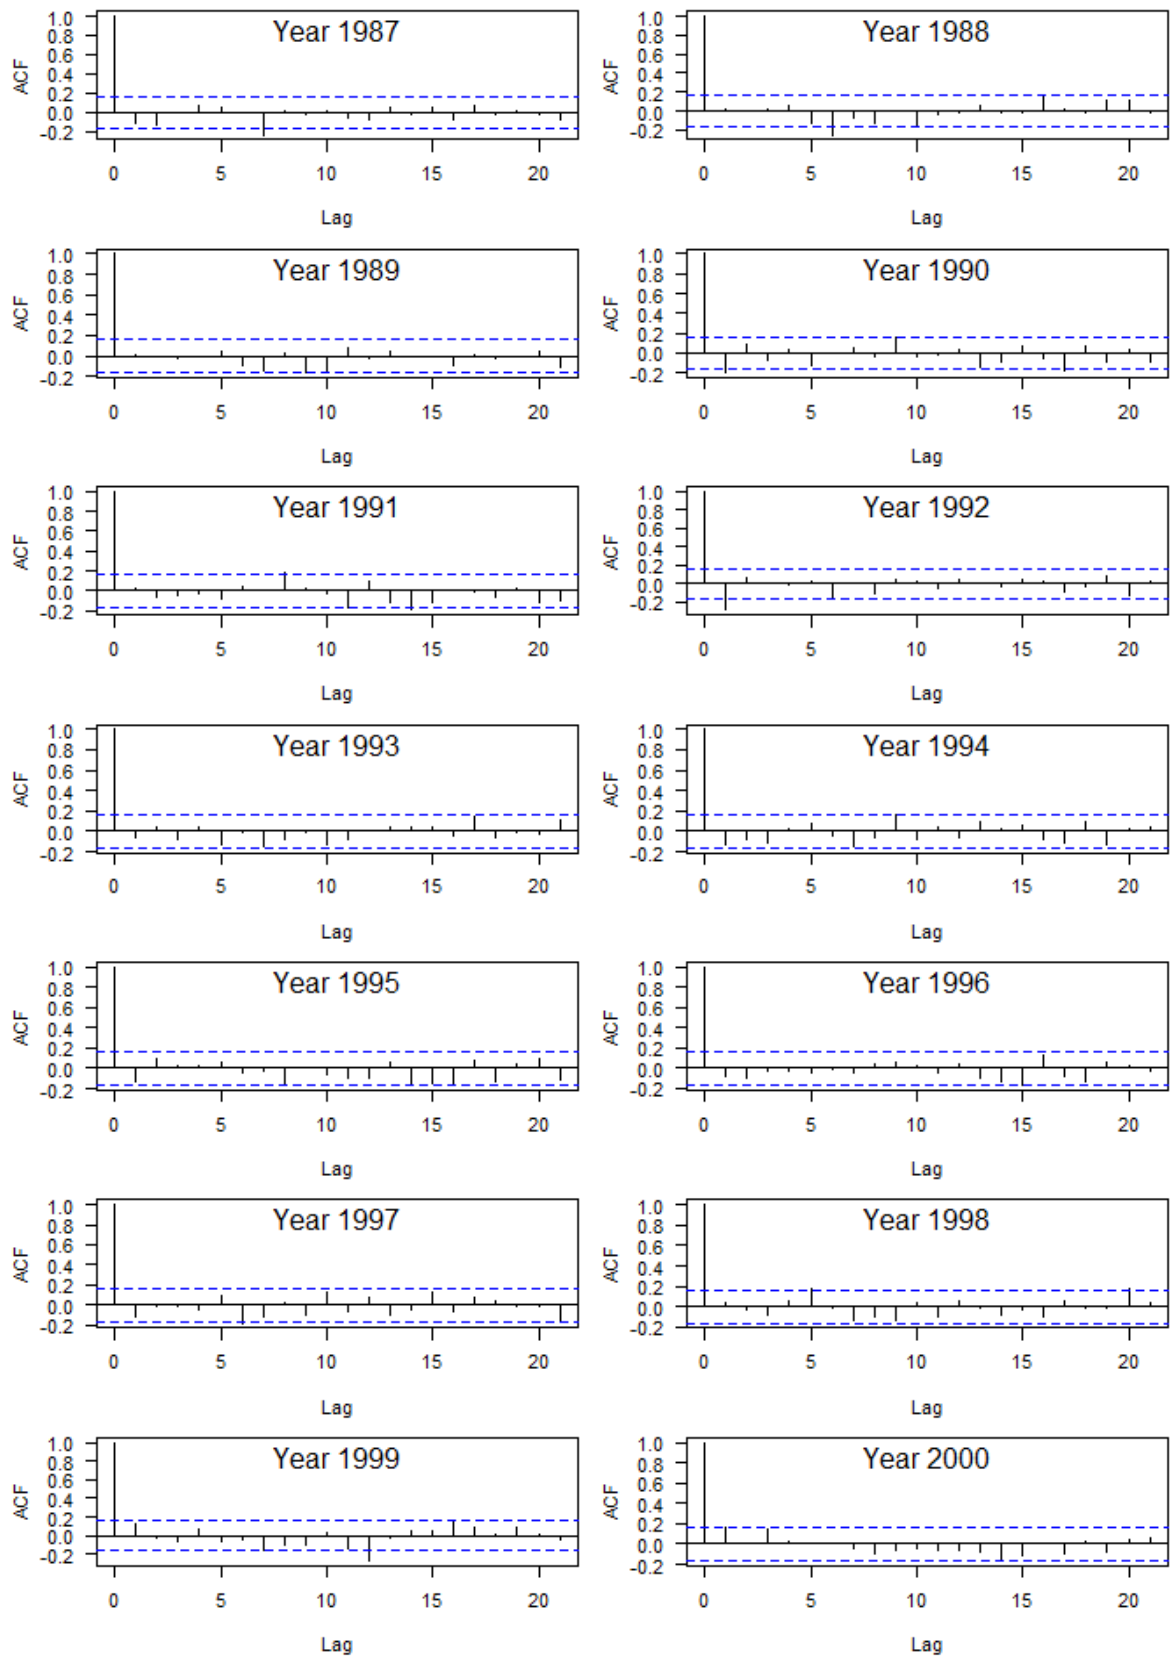

**Supplementary Figure S1:** Autocorrelation functions for the residuals from the time series analyses for each year in New York city. The high temperatures were defined as two or more

than two consecutive days with temperature above the 90<sup>th</sup> percentile. Dashed horizontal lines show the test that the autocorrelation is non-zero.

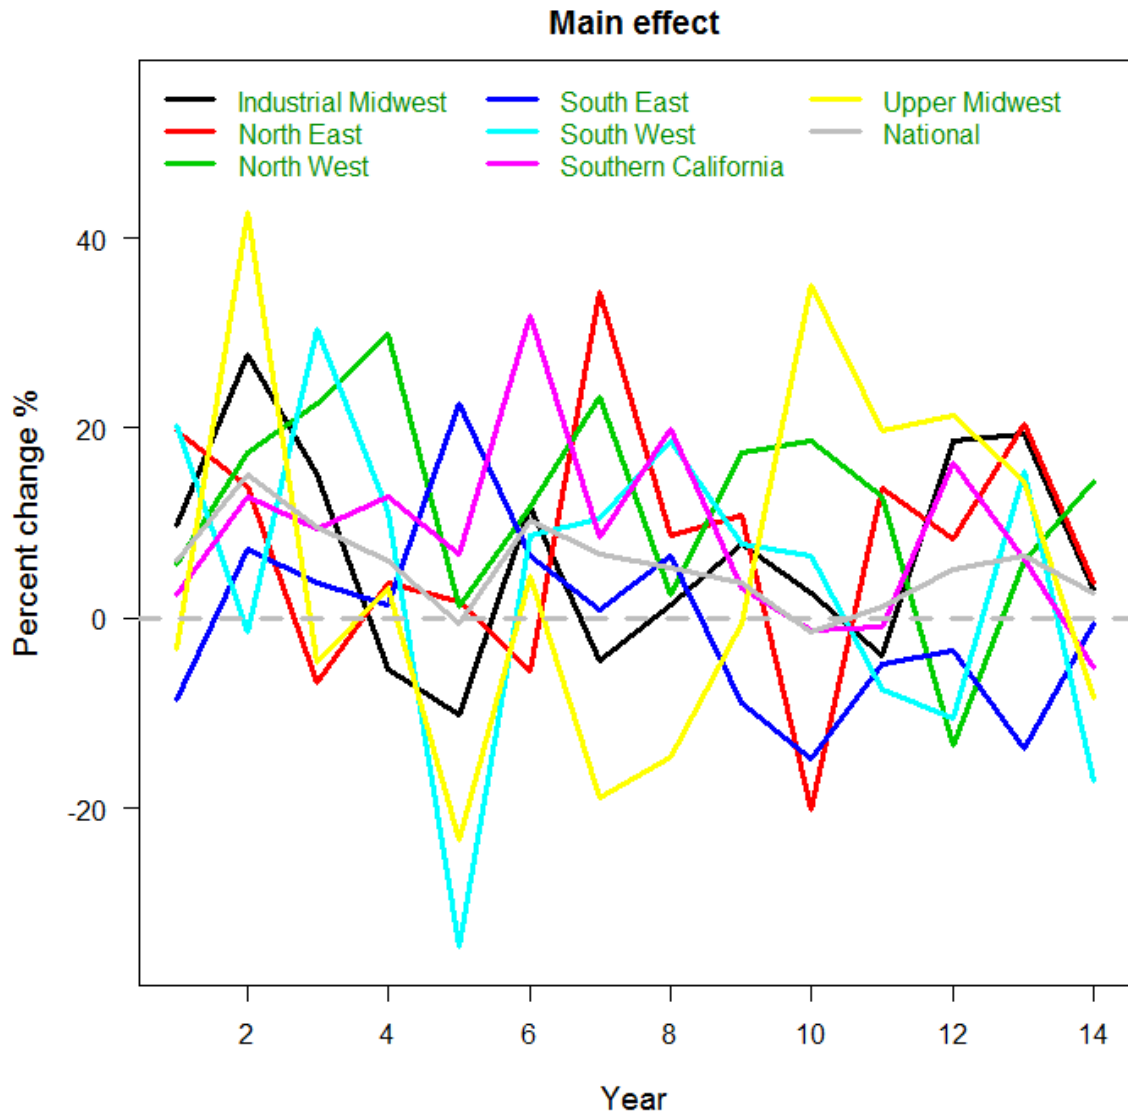

**Supplementary Figure S2:** Mean associations between high temperatures and elderly mortality by region between 1987 and 2000 using a univariate meta-analysis. The high temperatures were defined as two or more than two consecutive days with temperature above the 95<sup>th</sup> percentile for each city during each warm season .
